# Supplementary material for: Knowledge, Attitudes, and Practices (KAP) Regarding Antibiotic Use among University Students at Bahir Dar University, Ethiopia: A Pilot Study
Source: Research Square preprint supplement (doi:10.21203/rs.3.rs-6879764/v1), 2025-07-10
Supplement: Supplementary file 1 [file ca6d231e410af766580ba5f5.xlsx]

## Sheet: KAP Survey Responses
Timestamp	Before continuing, please read and agree to the following: "This study is conducted for academic purposes to assess knowledge, attitudes, and practices regarding antibiotic use among Bahir Dar University students. Participation is voluntary, anonymous, a	Age	Gender	Department/Faculty	Year of Study	1. Have you ever taken antibiotics?	2. Antibiotics are effective against:	3. It is okay to stop antibiotics when symptoms improve.	4. Using antibiotics unnecessarily can lead to resistance.	5. You should always finish the full course of antibiotics.	6. Is it safe to use leftover antibiotics from a previous illness?	7. I believe antibiotics help me recover faster from a cold or flu.	8. I trust doctors when they don’t prescribe antibiotics.	9. I think people should be able to buy antibiotics without a prescription.	10. In the last year, how many times have you used antibiotics?	11. Where do you usually get antibiotics from?	12. Have you ever taken antibiotics without seeing a doctor?	13. Do you always finish the full dose when you take antibiotics?	14. Have you ever shared your antibiotics with others?
2025-05-29 21:35:52	I agree to participate.	19	Female	College of Medicine and Health Sciences	1st year	Yes	I don't know	FALSE	Not sure	TRUE	FALSE	Agree	Agree	Disagree	3 - 5 times	Doctor’s prescription	Yes	Sometimes	Yes
2025-05-29 08:22:35	I agree to participate.	19	Male	College of Medicine and Health Sciences	3rd year	Yes	Bacteria only	FALSE	TRUE	TRUE	FALSE	Strongly disagree	Neutral	Strongly disagree	1 - 2 times	Doctor’s prescription	No	Yes	No
2025-05-29 16:49:22	I agree to participate.	20	Male	Faculty of Computing	3rd year	Yes	Bacteria only	FALSE	Not sure	TRUE	Not sure	Disagree	Disagree	Agree	I don't remember	Friends or family	Yes	No	Yes
2025-05-30 08:02:35	I agree to participate.	20	Male	College of Medicine and Health Sciences	2nd year	Yes	Bacteria only	FALSE	TRUE	FALSE	FALSE	Disagree	Neutral	Disagree	1 - 2 times	Doctor’s prescription	No	No	No
2025-05-29 18:14:11	I agree to participate.	20	Male	Faculty of Computing	2nd year	Yes	I don't know	FALSE	TRUE	TRUE	FALSE	Disagree	Agree	Disagree	0	Friends or family	Yes	No	Yes
2025-05-29 09:35:39	I agree to participate.	20	Female	Faculty of Computing	2nd year	Yes	Bacteria only	FALSE	TRUE	TRUE	FALSE	Disagree	Disagree	Disagree	1 - 2 times	Doctor’s prescription	Yes	Sometimes	Yes
2025-06-03 12:17:40	I agree to participate.	20	Male	School of Law	3rd year	Yes	Both bacteria and viruses	FALSE	TRUE	TRUE	Not sure	Agree	Neutral	Disagree	I don't remember	Friends or family	Yes	Sometimes	Yes
2025-06-01 11:43:44	I agree to participate.	20	Male	College of Medicine and Health Sciences	2nd year	No	Both bacteria and viruses	TRUE	TRUE	FALSE	FALSE	Agree	Agree	Strongly argee	I don't remember	Pharmacy without prescription	I don’t remember	Sometimes	No
2025-05-30 11:07:07	I agree to participate.	20	Male	College of Medicine and Health Sciences	2nd year	Yes	Bacteria only	FALSE	TRUE	TRUE	FALSE	Strongly disagree	Strongly agree	Strongly disagree	3 - 5 times	Pharmacy without prescription	Yes	Yes	No
2025-06-01 08:02:50	I agree to participate.	20	Female	College of Medicine and Health Sciences	3rd year	Yes	Bacteria only	FALSE	TRUE	TRUE	FALSE	Disagree	Agree	Strongly disagree	I don't remember	Pharmacy without prescription	Yes	Yes	No
2025-05-30 07:58:35	I agree to participate.	20	Female	College of Medicine and Health Sciences	3rd year	Yes	Both bacteria and viruses	TRUE	TRUE	FALSE	FALSE	Agree	Agree	Strongly disagree	3 - 5 times	Friends or family	Yes	No	Yes
2025-06-06 17:14:22	I agree to participate.	21	Male	College of Educational and Behavioral Sciences	3rd year	Yes	I don't know	TRUE	FALSE	TRUE	TRUE	Agree	Agree	Agree	3 - 5 times	Doctor’s prescription	No	No	Yes
2025-05-29 16:54:57	I agree to participate.	21	Male	Faculty of Mechanical and Industrial Engineering	3rd year	Yes	Bacteria only	FALSE	TRUE	TRUE	FALSE	Agree	Agree	Agree	1 - 2 times	Friends or family	Yes	No	Yes
2025-06-06 17:26:47	I agree to participate.	21	Male	College of Natural Sciences	4th year	Yes	Bacteria only	TRUE	FALSE	Not sure	Not sure	Agree	Neutral	Agree	More than 5 times	Pharmacy without prescription	Yes	No	Yes
2025-06-01 17:35:42	I agree to participate.	21	Female	College of Medicine and Health Sciences	2nd year	Yes	Bacteria only	FALSE	TRUE	Not sure	FALSE	Agree	Agree	Disagree	I don't remember	Doctor’s prescription	No	Yes	No
2025-05-30 15:24:05	I agree to participate.	21	Female	College of Medicine and Health Sciences	3rd year	Yes	Bacteria only	FALSE	TRUE	TRUE	FALSE	Agree	Agree	Disagree	1 - 2 times	Doctor’s prescription	Yes	Yes	No
2025-05-30 08:03:16	I agree to participate.	21	Male	College of Medicine and Health Sciences	2nd year	Yes	Bacteria only	FALSE	TRUE	TRUE	FALSE	Strongly agree	Agree	Disagree	1 - 2 times	Doctor’s prescription	Yes	Yes	No
2025-05-29 20:06:34	I agree to participate.	21	Male	College of Natural Sciences	3rd year	Yes	I don't know	FALSE	TRUE	TRUE	FALSE	Agree	Neutral	Disagree	1 - 2 times	Friends or family	Yes	No	Yes
2025-05-29 20:09:14	I agree to participate.	21	Male	College of Natural Sciences	3rd year	Yes	I don't know	FALSE	TRUE	TRUE	FALSE	Agree	Neutral	Disagree	1 - 2 times	Friends or family	Yes	No	Yes
2025-05-29 17:57:40	I agree to participate.	21	Male	College of Business and Economics	3rd year	Yes	I don't know	FALSE	TRUE	TRUE	FALSE	Agree	Agree	Disagree	1 - 2 times	Pharmacy without prescription	I don’t remember	Sometimes	Yes
2025-05-30 07:34:39	I agree to participate.	21	Female	College of Medicine and Health Sciences	3rd year	Yes	Both bacteria and viruses	Not sure	TRUE	TRUE	FALSE	Disagree	Agree	Disagree	More than 5 times	Doctor’s prescription	Yes	Sometimes	Yes
2025-05-30 08:34:36	I agree to participate.	21	Male	College of Business and Economics	3rd year	Yes	Bacteria only	FALSE	FALSE	TRUE	FALSE	Neutral	Agree	Disagree	I don't remember	Pharmacy without prescription	No	Yes	Yes
2025-06-03 18:40:45	I agree to participate.	21	Female	Faculty of Humanitiess	3rd year	Yes	Bacteria only	FALSE	FALSE	TRUE	Not sure	Strongly agree	Neutral	Neutral	More than 5 times	Pharmacy without prescription	Yes	Sometimes	Yes
2025-05-29 16:47:06	I agree to participate.	21	Male	College of Business and Economics	3rd year	No	Both bacteria and viruses	FALSE	FALSE	TRUE	FALSE	Strongly agree	Neutral	Strongly disagree	3 - 5 times	Doctor’s prescription	No	Yes	No
2025-05-29 11:36:24	I agree to participate.	21	Male	College of Business and Economics	3rd year	Yes	Both bacteria and viruses	FALSE	TRUE	Not sure	Not sure	Agree	Strongly disagree	Strongly disagree	0	Doctor’s prescription	Yes	No	Yes
2025-05-29 16:18:09	I agree to participate.	21	Male	College of Business and Economics	3rd year	Not sure	I don't know	Not sure	Not sure	Not sure	Not sure	Disagree	Disagree	Strongly disagree	I don't remember	Friends or family	I don’t remember	Sometimes	Yes
2025-05-30 07:41:47	I agree to participate.	21	Male	Faculty of Electrical and Computer Engineering	2nd year	Yes	Bacteria only	FALSE	TRUE	TRUE	FALSE	Agree	Strongly agree	Strongly disagree	I don't remember	Doctor’s prescription	Yes	Sometimes	Yes
2025-05-30 08:03:24	I agree to participate.	21	Female	College of Medicine and Health Sciences	2nd year	Yes	Bacteria only	FALSE	TRUE	TRUE	FALSE	Neutral	Agree	Strongly disagree	1 - 2 times	Pharmacy without prescription	Yes	Yes	Yes
2025-05-30 17:33:32	I agree to participate.	21	Male	College of Medicine and Health Sciences	5th year or above	Yes	Bacteria only	FALSE	TRUE	TRUE	FALSE	Strongly disagree	Agree	Strongly disagree	3 - 5 times	Pharmacy without prescription	Yes	Yes	Yes
2025-05-30 17:36:59	I agree to participate.	22	Male	Faculty of Computing	3rd year	No	Bacteria only	TRUE	FALSE	Not sure	TRUE	Agree	Disagree	Agree	I don't remember	Friends or family	I don’t remember	No	No
2025-06-03 08:22:50	I agree to participate.	22	Male	College of Natural Sciences	4th year	Not sure	I don't know	Not sure	TRUE	TRUE	FALSE	Neutral	Agree	Agree	More than 5 times	Pharmacy without prescription	Yes	No	Yes
2025-05-29 10:02:53	I agree to participate.	22	Male	College of Medicine and Health Sciences	2nd year	Yes	Bacteria only	FALSE	TRUE	FALSE	FALSE	Neutral	Agree	Agree	More than 5 times	Leftovers at home	No	Yes	Yes
2025-06-04 04:45:28	I agree to participate.	22	Male	Faculty of Mechanical and Industrial Engineering	3rd year	Yes	Bacteria only	TRUE	FALSE	FALSE	FALSE	Neutral	Agree	Disagree	1 - 2 times	Doctor’s prescription	No	No	No
2025-06-01 17:25:28	I agree to participate.	22	Male	College of Medicine and Health Sciences	2nd year	Yes	Bacteria only	Not sure	TRUE	TRUE	Not sure	Strongly disagree	Agree	Disagree	1 - 2 times	Doctor’s prescription	Yes	No	No
2025-05-29 16:26:47	I agree to participate.	22	Male	Faculty of Mechanical and Industrial Engineering	4th year	Yes	Bacteria only	TRUE	TRUE	TRUE	Not sure	Disagree	Neutral	Disagree	1 - 2 times	Doctor’s prescription	Yes	Yes	No
2025-05-30 14:23:05	I agree to participate.	22	Male	Faculty of Computing	3rd year	Yes	Bacteria only	Not sure	TRUE	Not sure	FALSE	Neutral	Agree	Disagree	1 - 2 times	Doctor’s prescription	No	No	Yes
2025-05-29 10:11:19	I agree to participate.	22	Male	College of Medicine and Health Sciences	3rd year	Yes	Bacteria only	FALSE	TRUE	TRUE	FALSE	Disagree	Agree	Disagree	3 - 5 times	Friends or family	Yes	No	Yes
2025-05-31 17:52:30	I agree to participate.	22	Female	College of Medicine and Health Sciences	3rd year	Yes	Both bacteria and viruses	FALSE	TRUE	TRUE	FALSE	Agree	Neutral	Disagree	1 - 2 times	Pharmacy without prescription	Yes	No	Yes
2025-05-29 10:04:34	I agree to participate.	22	Female	College of Medicine and Health Sciences	4th year	Yes	Bacteria only	FALSE	TRUE	TRUE	FALSE	Agree	Neutral	Disagree	1 - 2 times	Pharmacy without prescription	Yes	Sometimes	Yes
2025-06-01 16:24:37	I agree to participate.	22	Female	College of Medicine and Health Sciences	4th year	Yes	Bacteria only	TRUE	Not sure	TRUE	FALSE	Agree	Neutral	Disagree	0	Doctor’s prescription	Yes	Yes	Yes
2025-06-01 10:36:24	I agree to participate.	22	Male	College of Medicine and Health Sciences	3rd year	Yes	Bacteria only	FALSE	TRUE	TRUE	FALSE	Neutral	Strongly agree	Neutral	1 - 2 times	Doctor’s prescription	No	Yes	No
2025-05-30 07:21:08	I agree to participate.	22	Male	Faculty of Electrical and Computer Engineering	3rd year	Not sure	Bacteria only	TRUE	TRUE	Not sure	Not sure	Agree	Disagree	Neutral	I don't remember	Pharmacy without prescription	Yes	No	Yes
2025-05-29 20:20:13	I agree to participate.	22	Male	Faculty of Electrical and Computer Engineering	5th year or above	Yes	Bacteria only	TRUE	TRUE	TRUE	Not sure	Neutral	Neutral	Strongly disagree	0	Pharmacy without prescription	Yes	No	No
2025-06-01 08:53:56	I agree to participate.	22	Female	College of Medicine and Health Sciences	4th year	Yes	Bacteria only	FALSE	TRUE	TRUE	FALSE	Neutral	Neutral	Strongly disagree	1 - 2 times	Doctor’s prescription	Yes	Sometimes	No
2025-06-01 10:21:57	I agree to participate.	22	Male	College of Medicine and Health Sciences	3rd year	Yes	Bacteria only	FALSE	TRUE	TRUE	FALSE	Agree	Agree	Strongly disagree	1 - 2 times	Doctor’s prescription	No	Yes	No
2025-06-01 15:00:53	I agree to participate.	22	Male	College of Medicine and Health Sciences	3rd year	Yes	Bacteria only	FALSE	TRUE	TRUE	FALSE	Disagree	Disagree	Strongly disagree	1 - 2 times	Doctor’s prescription	No	Yes	No
2025-05-29 17:54:35	I agree to participate.	22	Male	College of Medicine and Health Sciences	2nd year	Yes	Bacteria only	FALSE	TRUE	TRUE	FALSE	Strongly agree	Disagree	Strongly disagree	3 - 5 times	Doctor’s prescription	No	Yes	No
2025-05-29 10:45:35	I agree to participate.	22	Male	College of Medicine and Health Sciences	2nd year	Not sure	I don't know	Not sure	TRUE	TRUE	FALSE	Neutral	Strongly agree	Strongly disagree	I don't remember	Doctor’s prescription	No	Yes	No
2025-06-01 11:03:08	I agree to participate.	22	Female	College of Medicine and Health Sciences	3rd year	Yes	Bacteria only	FALSE	TRUE	TRUE	FALSE	Neutral	Disagree	Strongly disagree	1 - 2 times	Pharmacy without prescription	Yes	Yes	No
2025-05-30 11:51:12	I agree to participate.	22	Male	College of Medicine and Health Sciences	2nd year	Yes	Bacteria only	FALSE	TRUE	TRUE	FALSE	Strongly disagree	Strongly disagree	Strongly disagree	1 - 2 times	Doctor’s prescription	Yes	Yes	Yes
2025-05-29 09:52:51	I agree to participate.	22	Female	College of Medicine and Health Sciences	4th year	Yes	Bacteria only	FALSE	FALSE	TRUE	FALSE	Agree	Disagree	Strongly disagree	0	Pharmacy without prescription	Yes	Yes	Yes
2025-05-29 21:47:58	I agree to participate.	23	Male	School of Law	4th year	Yes	I don't know	TRUE	Not sure	FALSE	TRUE	Agree	Neutral	Agree	1 - 2 times	Doctor’s prescription	I don’t remember	No	No
2025-06-03 08:43:40	I agree to participate.	23	Male	College of Business and Economics	3rd year	Yes	Viruses only	FALSE	FALSE	TRUE	FALSE	Agree	Agree	Agree	More than 5 times	Doctor’s prescription	No	No	Yes
2025-05-29 22:53:23	I agree to participate.	23	Female	College of Medicine and Health Sciences	4th year	Yes	Bacteria only	FALSE	TRUE	TRUE	FALSE	Strongly disagree	Neutral	Disagree	1 - 2 times	Friends or family	Yes	No	No
2025-06-01 10:28:10	I agree to participate.	23	Male	Faculty of Electrical and Computer Engineering	4th year	Yes	Bacteria only	FALSE	TRUE	FALSE	FALSE	Agree	Disagree	Disagree	1 - 2 times	Doctor’s prescription	No	No	Yes
2025-05-29 17:54:50	I agree to participate.	23	Male	Faculty of Electrical and Computer Engineering	4th year	Yes	Bacteria only	FALSE	TRUE	TRUE	FALSE	Disagree	Agree	Disagree	1 - 2 times	Doctor’s prescription	Yes	No	Yes
2025-06-03 08:36:04	I agree to participate.	23	Male	College of Natural Sciences	4th year	Yes	Both bacteria and viruses	Not sure	FALSE	TRUE	TRUE	Agree	Neutral	Disagree	1 - 2 times	Pharmacy without prescription	Yes	No	Yes
2025-05-30 07:33:08	I agree to participate.	23	Female	College of Medicine and Health Sciences	4th year	Yes	Bacteria only	FALSE	TRUE	TRUE	FALSE	Neutral	Neutral	Neutral	3 - 5 times	Doctor’s prescription	Yes	No	Yes
2025-05-31 05:03:30	I agree to participate.	23	Female	College of Medicine and Health Sciences	4th year	Yes	Both bacteria and viruses	FALSE	TRUE	TRUE	FALSE	Disagree	Agree	Strongly disagree	1 - 2 times	Doctor’s prescription	No	No	No
2025-05-29 13:26:27	I agree to participate.	23	Male	College of Medicine and Health Sciences	5th year or above	Yes	Bacteria only	FALSE	TRUE	TRUE	FALSE	Strongly agree	Strongly agree	Strongly disagree	3 - 5 times	Pharmacy without prescription	Yes	No	Yes
2025-06-01 08:09:04	I agree to participate.	23	Female	College of Medicine and Health Sciences	4th year	Yes	Bacteria only	FALSE	TRUE	TRUE	FALSE	Neutral	Strongly agree	Strongly disagree	1 - 2 times	Doctor’s prescription	Yes	Yes	Yes
2025-05-30 07:56:13	I agree to participate.	24	Male	College of Medicine and Health Sciences	4th year	Yes	Bacteria only	FALSE	TRUE	TRUE	Not sure	Disagree	Strongly agree	Disagree	3 - 5 times	Doctor’s prescription	Yes	No	Yes
2025-06-01 08:06:49	I agree to participate.	24	Female	College of Medicine and Health Sciences	3rd year	No	Both bacteria and viruses	TRUE	TRUE	TRUE	FALSE	Strongly agree	Strongly disagree	Strongly argee	0	Pharmacy without prescription	Yes	Yes	No
2025-05-29 21:58:54	I agree to participate.	24	Male	College of Medicine and Health Sciences	5th year or above	Yes	Bacteria only	FALSE	TRUE	TRUE	FALSE	Strongly disagree	Strongly agree	Strongly disagree	0	Doctor’s prescription	I don’t remember	Yes	No
2025-05-30 07:49:50	I agree to participate.	24	Male	College of Medicine and Health Sciences	5th year or above	Yes	Bacteria only	FALSE	TRUE	TRUE	FALSE	Disagree	Strongly agree	Strongly disagree	1 - 2 times	Doctor’s prescription	No	Yes	Yes
2025-05-30 07:50:16	I agree to participate.	25	Male	College of Medicine and Health Sciences	5th year or above	Yes	Bacteria only	FALSE	TRUE	TRUE	FALSE	Strongly disagree	Strongly agree	Strongly disagree	1 - 2 times	Doctor’s prescription	Yes	Yes	No
2025-05-29 11:13:20	I agree to participate.	26	Male	College of Medicine and Health Sciences	5th year or above	Yes	Bacteria only	FALSE	TRUE	TRUE	FALSE	Disagree	Agree	Disagree	1 - 2 times	Doctor’s prescription	Yes	No	Yes
2025-05-30 13:36:23	I agree to participate.	26	Male	College of Medicine and Health Sciences	5th year or above	Yes	Bacteria only	FALSE	TRUE	TRUE	TRUE	Disagree	Agree	Neutral	1 - 2 times	Pharmacy without prescription	Yes	No	Yes
2025-05-29 18:12:07	I agree to participate.	26	Male	Faculty of Mechanical and Industrial Engineering	5th year or above	Yes	Bacteria only	FALSE	TRUE	TRUE	FALSE	Strongly agree	Strongly agree	Strongly disagree	1 - 2 times	Pharmacy without prescription	Yes	No	Yes
2025-05-29 10:27:35	I agree to participate.	27	Female	College of Medicine and Health Sciences	5th year or above	Yes	Bacteria only	FALSE	TRUE	TRUE	FALSE	Neutral	Strongly agree	Disagree	1 - 2 times	Pharmacy without prescription	Yes	Yes	No
